# Supplementary material for: Effects of Boiling Drinking Water on Diarrhea and Pathogen-Specific Infections in Low- and Middle-Income Countries: A Systematic Review and Meta-Analysis
Source: PubMed Central journal article supplement (PMC5817760; doi:10.4269/ajtmh.17-0190), 2017-09-05
Supplement: tpmd170190.SD1.pdf [file tpmd170190.SD1.pdf]

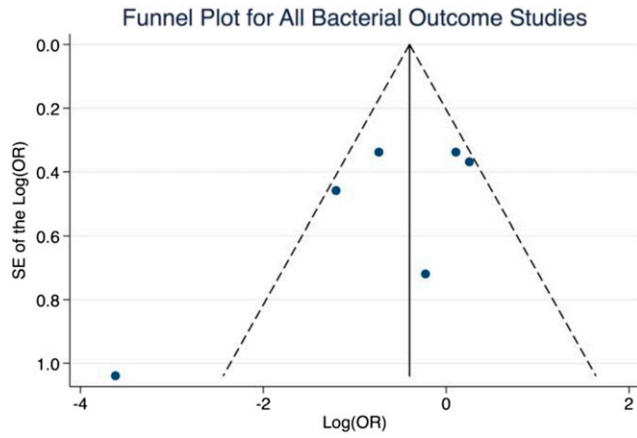

SUPPLEMENTAL FIGURE 1. Funnel plot for all bacterial outcome studies (using all study outcomes).

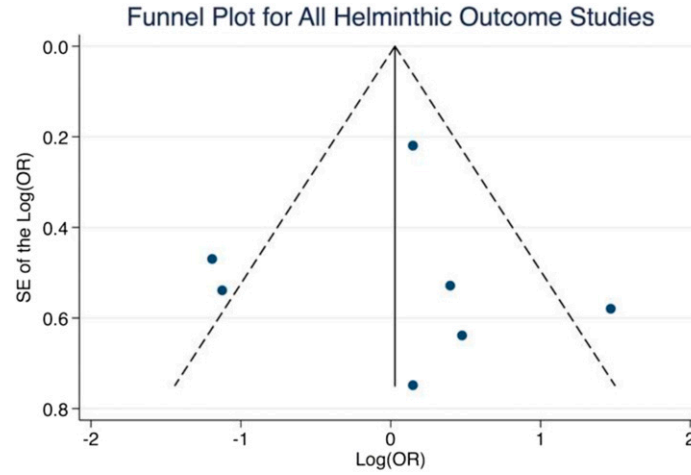

SUPPLEMENTAL FIGURE 3. Funnel plot for all helminthic outcome studies (using all study outcomes).

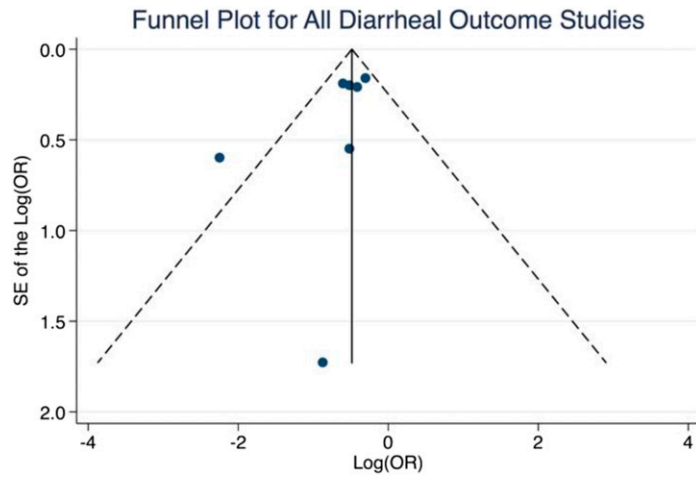

SUPPLEMENTAL FIGURE 2. Funnel plot for all diarrheal outcome studies (using all study outcomes).

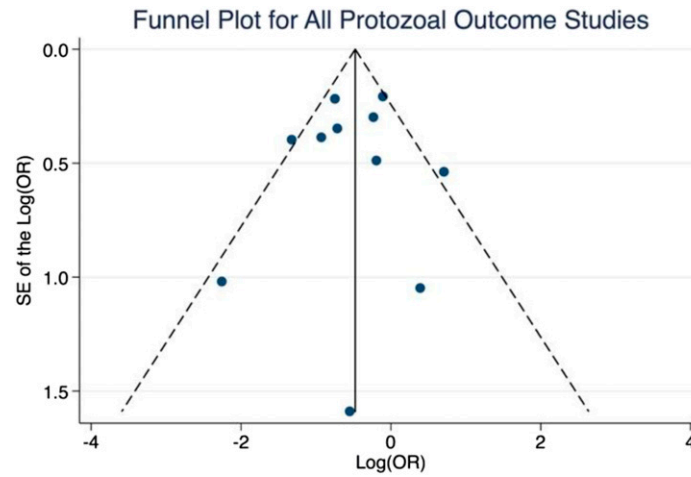

SUPPLEMENTAL FIGURE 4. Funnel plot for all protozoal outcome studies (using all study outcomes).

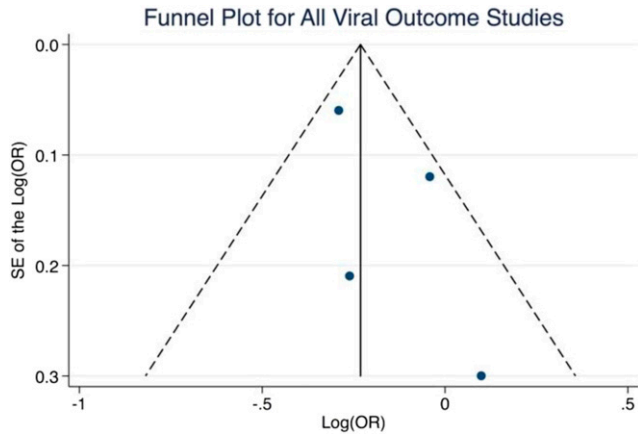

SUPPLEMENTAL FIGURE 5. Funnel plot for all viral outcome studies (using all study outcomes).

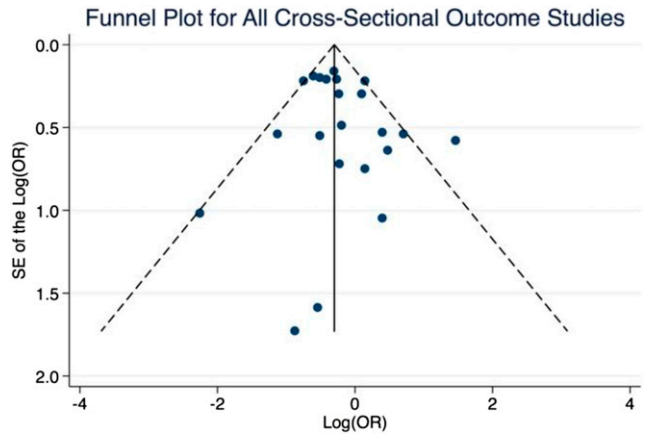

SUPPLEMENTAL FIGURE 7. Funnel plots for cross-sectional study outcomes.

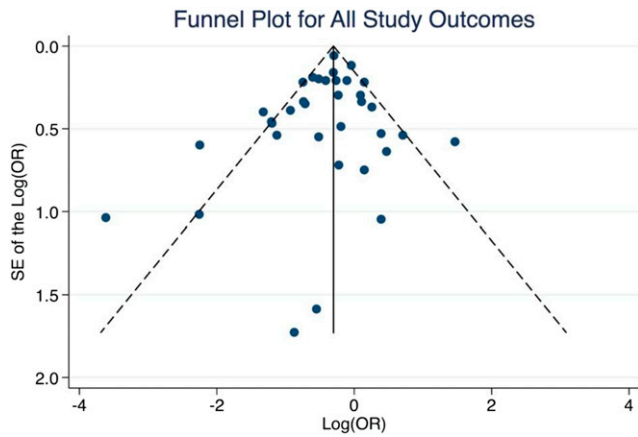

SUPPLEMENTAL FIGURE 6. Funnel plots for all study outcomes.

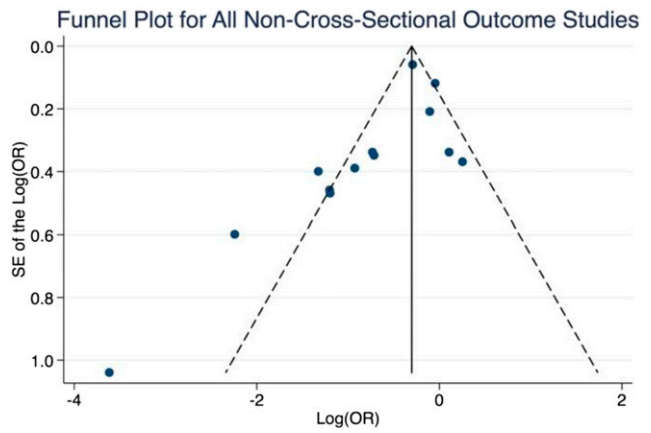

SUPPLEMENTAL FIGURE 8. Funnel plots for non-cross-sectional study outcomes.

SUPPLEMENTAL TABLE 1  
Full list of search terms by search sets

| 1                   | 2                                    | 3                                  | 4                                                                |
|---------------------|--------------------------------------|------------------------------------|------------------------------------------------------------------|
| Drinking water      | Boiling and drinking water treatment | GI-related diseases                | Low-/middle-income countries* (with "OR" inserted between names) |
| "Domestic water"    | Boil                                 | "Acute gastrointestinal"           | Afghanistan OR Algeria OR Angola OR                              |
| "Drinking water"    | Boiled                               | "AGI"                              | Anguilla OR Antigua OR Barbuda OR                                |
| "Potable water"     | Boiling                              | "AGII"                             | Argentina OR Armenia OR Armenian                                 |
| "Tap water"         | Decontamination                      | "HCGI"                             | OR Aruba OR Azerbaijan OR Bahamas                                |
| Water               | Disinfect                            | "Highly credible gastrointestinal" | OR Bahrain OR Bangladesh OR                                      |
| "Water consumption" | Disinfectant                         | <i>Campylobacter</i>               | Barbados OR Benin OR Byelarus OR                                 |
| "Well water"        | Disinfection                         | Cholera                            | Byelorussian OR Belarus OR                                       |
|                     | Domestic                             | Cholerae                           | Belorussian OR Belorussia OR Belize                              |
|                     | Household                            | Cryptosporidium                    | OR Bhutan OR Bolivia OR Botswana                                 |
|                     | Inactivation                         | Diarrhea                           | OR Brazil OR Brunei OR Burkina Faso                              |
|                     | Pasteurise                           | Diarrheal                          | OR "Burkina Faso" OR "Upper Volta"                               |
|                     | Pasteurised                          | "Diarrheal disease"                | OR Burundi OR Urundi OR Cambodia                                 |
|                     | Pasteurize                           | Diarrhea                           | OR "Khmer Republic" OR Kampuchea                                 |
|                     | Pasteurized                          | Diarrheal                          | OR Cameroon OR Camerouns OR                                      |
|                     | "Point of use"                       | "Diarrheal disease"                | Cameron OR Camerons OR "Cape                                     |
|                     | Point-of-use                         | Dysentery                          | Verde" OR "Cayman Islands" OR                                    |
|                     | "POU"                                | "E. coli"                          | "Central African Republic" OR Chad OR                            |
|                     | Purification                         | Enteric                            | Chile OR China OR Colombia OR                                    |
|                     | Purified                             | "Enteric virus"                    | Comoros OR "Comoro Islands" OR                                   |
|                     | Purify                               | "Enteric viruses"                  | Comores OR Mayotte OR Congo OR                                   |
|                     | Residential                          | Enterovirus                        | Zaire OR "Cook Islands" OR "Costa                                |
|                     | "Safe water"                         | Enteroviruses                      | Rica" OR "Cote d'Ivoire" OR "Ivory                               |
|                     | Treat                                | "E. coli"                          | Coast" OR Croatia OR Cuba OR Cyprus                              |
|                     | Treated                              | "Escherichia coli"                 | OR Djibouti OR "French Somaliland"                               |
|                     | Treating                             | Gastrointestinal                   | OR Dominica OR "Dominican                                        |
|                     | Treatment                            | "Gastro intestinal"                | Republic" OR "East Timor" OR "East                               |
|                     | "Water disinfection"                 | Gastro-enteric                     | Timur" OR "Timor Leste" OR Ecuador                               |
|                     | "Water purification"                 | <i>Giardia</i>                     | OR Egypt OR "United Arab Republic"                               |
|                     | "Water quality"                      | Helicobacter                       | OR "El Salvador" OR Eritrea OR                                   |
|                     | "Water treatment"                    | Helminth                           | Ethiopia OR "Falkland Islands" OR "Las                           |
|                     |                                      | Hepatitis                          | Malvinas" OR Fiji OR Gabon OR                                    |
|                     |                                      | Intestinal                         | "Gabonese Republic" OR Gambia OR                                 |
|                     |                                      | Norovirus                          | Gaza OR "Georgia Republic" OR                                    |
|                     |                                      | "Norovirus-like virus"             | "Georgian Republic" OR Ghana OR                                  |
|                     |                                      | Rotavirus                          | "Gold Coast" OR Greece OR Grenada                                |
|                     |                                      | <i>Salmonella</i>                  | OR Guatemala OR Guinea OR Guam                                   |
|                     |                                      | Shigella                           | OR Guadeloupe OR Guiana OR Guyana                                |
|                     |                                      | "Vibrio cholera"                   | OR Haiti OR Honduras OR "Hong                                    |
|                     |                                      | "Vibrio cholerae"                  | Kong" OR India OR Maldives OR                                    |
|                     |                                      | Waterborne                         | Indonesia OR Iran OR Iraq OR Jamaica                             |
|                     |                                      | Water-borne                        | OR Jordan OR Kazakhstan OR Kazakh                                |
|                     |                                      | "Waterborne pathogen"              | OR Kenya OR Kiribati OR Korea OR                                 |
|                     |                                      | "Waterborne pathogens"             | Kosovo OR Kuwait OR Kyrgyzstan OR                                |
|                     |                                      |                                    | Kirghizia OR "Kyrgyz Republic" OR                                |
|                     |                                      |                                    | Kirghiz OR Kirgizstan OR "Lao PDR"                               |
|                     |                                      |                                    | OR Laos OR Lebanon OR Lesotho OR                                 |
|                     |                                      |                                    | Basutoland OR Liberia OR Libya OR                                |
|                     |                                      |                                    | Macau OR Madagascar OR "Malagasy                                 |
|                     |                                      |                                    | Republic" OR Maldives OR Malaysia                                |
|                     |                                      |                                    | OR Malaya OR Malay OR Sabah OR                                   |
|                     |                                      |                                    | Sarawak OR Malawi OR Nyasaland OR                                |
|                     |                                      |                                    | Mali OR Malta OR "Marshall Islands"                              |
|                     |                                      |                                    | OR Martinique OR Mauritania OR                                   |
|                     |                                      |                                    | Mauritius OR "Agalega Islands" OR                                |
|                     |                                      |                                    | Mexico OR Micronesia OR "Middle                                  |
|                     |                                      |                                    | East" OR Mongolia OR Montserrat OR                               |
|                     |                                      |                                    | Morocco OR Ifni OR Mozambique OR                                 |
|                     |                                      |                                    | Myanmar OR Myanma OR Burma OR                                    |
|                     |                                      |                                    | Namibia OR Nauru OR Nepal OR Niui                                |
|                     |                                      |                                    | OR "Netherlands Antilles" OR "New                                |
|                     |                                      |                                    | Caledonia" OR Nicaragua OR Niger OR                              |
|                     |                                      |                                    | Nigeria OR "Northern Mariana Islands"                            |
|                     |                                      |                                    | OR Oman OR Mayotte OR Muscat OR                                  |
|                     |                                      |                                    | Pakistan OR Palau OR Palestine OR                                |
|                     |                                      |                                    | Panama OR Paraguay OR Peru OR                                    |
|                     |                                      |                                    | Philippines OR Philipines OR Phillipines                         |
|                     |                                      |                                    | OR Phillipines OR Polynesia OR                                   |

(continued)

SUPPLEMENTAL TABLE 1  
Continued

| 1              | 2                                    | 3                   | 4                                                                                                                                                                                                                                                                                                                                                                                                                                                                                                                                                                                                                                                                                                                                                                                                                                                                                                                                                                                                                                                                                                                      |
|----------------|--------------------------------------|---------------------|------------------------------------------------------------------------------------------------------------------------------------------------------------------------------------------------------------------------------------------------------------------------------------------------------------------------------------------------------------------------------------------------------------------------------------------------------------------------------------------------------------------------------------------------------------------------------------------------------------------------------------------------------------------------------------------------------------------------------------------------------------------------------------------------------------------------------------------------------------------------------------------------------------------------------------------------------------------------------------------------------------------------------------------------------------------------------------------------------------------------|
| Drinking water | Boiling and drinking water treatment | GI-related diseases | Low-/middle-income countries* (with "OR" inserted between names)                                                                                                                                                                                                                                                                                                                                                                                                                                                                                                                                                                                                                                                                                                                                                                                                                                                                                                                                                                                                                                                       |
|                |                                      |                     | <p>"Puerto Rico" OR Qatar OR Reunion<br/> OR Rwanda OR Ruanda OR "Saint<br/> Kitts" OR "St Kitts" OR Nevis OR "Saint<br/> Lucia" OR "St Lucia" OR "Saint<br/> Vincent" OR "St Vincent" OR<br/> Grenadines OR Samoa OR "Samoan<br/> Islands" OR "Navigator Island" OR<br/> "Navigator Islands" OR "Sao Tome" OR<br/> "Saudi Arabia" OR Senegal OR Serbia<br/> OR Montenegro OR Seychelles OR<br/> "Sierra Leone" OR Singapore OR "Sri<br/> Lanka" OR Ceylon OR "Solomon<br/> Islands" OR Somalia OR "South Africa"<br/> OR Sudan OR Suriname OR Surinam<br/> OR Swaziland OR Syria OR Tajikistan<br/> OR Tadjikistan OR Tadjikistan OR<br/> Tadjik OR Tanzania OR Thailand OR<br/> Togo OR "Togolese Republic" OR<br/> Tokelau OR Tonga OR Trinidad OR<br/> Tobago OR Tunisia OR Turkey OR<br/> Turkmenistan OR Turkmen OR "Turks<br/> Caicos" OR "Tuvalu Uganda" OR<br/> "United Arab Emirates" OR Uruguay<br/> OR Uzbekistan OR Uzbek OR Vanuatu<br/> OR "New Hebrides" OR Venezuela OR<br/> Vietnam OR "Viet Nam" OR "Virgin<br/> Islands" OR "West Bank" OR Yemen<br/> OR Yugoslavia OR Zambia OR<br/> Zimbabwe</p> |

Boolean operators: "OR" between row terms in each column, "AND" between full columns.  
\*This list was adapted from Bain and others.<sup>2</sup>

SUPPLEMENTAL TABLE 2  
Search terms, notes, and results for PubMed (MEDLINE and other sources)

| Boolean operators used between search term sets | Database searched (date of search)                                                                                                                                                                                                                                                                                                                                                                                                                                                                                                                                                                                                                                                                                                                                                                                                                                                                                                                                                                                                                                                                                                                                                                                                                                                                                                                                                                                                                                                                                                                                                                                                                                                                                                                                                                                                                                                                                                                                                                                                                                                                                                                                                                                                                                                                                                                                                                                                                                                                                                                                                                                                                                                                                                                                                                                                                                                                                                                                                                                                                                                                                                                                                                                                                                                                                                                                                                                                                                                                                                                                                                                                                                                                                                                                                                                                                                                                                                                                                                                                                                                                                                                                                                                                                                                                                                                                                                                                                                                                                                                                                                                                                                                                                                                                                                                                                                                                                                                                                                                                                                                                                                                                                                                                                                                                                                                                                                                                                                                                                                                                                                                                                                                                                                                                                                                                                                                                                                                                                                                                                                                                                                                                                                                                                                                                                                                                                                                                                                                                                                                                                                                                                                                                                                                                                                                                                                                                                                                                                                                                                                                                                                                                                                                                                                                                                                                                                                                                                                                                                                                                                                                                                                                                                                                                                    | Fields searched (limitations)                                               |
|-------------------------------------------------|---------------------------------------------------------------------------------------------------------------------------------------------------------------------------------------------------------------------------------------------------------------------------------------------------------------------------------------------------------------------------------------------------------------------------------------------------------------------------------------------------------------------------------------------------------------------------------------------------------------------------------------------------------------------------------------------------------------------------------------------------------------------------------------------------------------------------------------------------------------------------------------------------------------------------------------------------------------------------------------------------------------------------------------------------------------------------------------------------------------------------------------------------------------------------------------------------------------------------------------------------------------------------------------------------------------------------------------------------------------------------------------------------------------------------------------------------------------------------------------------------------------------------------------------------------------------------------------------------------------------------------------------------------------------------------------------------------------------------------------------------------------------------------------------------------------------------------------------------------------------------------------------------------------------------------------------------------------------------------------------------------------------------------------------------------------------------------------------------------------------------------------------------------------------------------------------------------------------------------------------------------------------------------------------------------------------------------------------------------------------------------------------------------------------------------------------------------------------------------------------------------------------------------------------------------------------------------------------------------------------------------------------------------------------------------------------------------------------------------------------------------------------------------------------------------------------------------------------------------------------------------------------------------------------------------------------------------------------------------------------------------------------------------------------------------------------------------------------------------------------------------------------------------------------------------------------------------------------------------------------------------------------------------------------------------------------------------------------------------------------------------------------------------------------------------------------------------------------------------------------------------------------------------------------------------------------------------------------------------------------------------------------------------------------------------------------------------------------------------------------------------------------------------------------------------------------------------------------------------------------------------------------------------------------------------------------------------------------------------------------------------------------------------------------------------------------------------------------------------------------------------------------------------------------------------------------------------------------------------------------------------------------------------------------------------------------------------------------------------------------------------------------------------------------------------------------------------------------------------------------------------------------------------------------------------------------------------------------------------------------------------------------------------------------------------------------------------------------------------------------------------------------------------------------------------------------------------------------------------------------------------------------------------------------------------------------------------------------------------------------------------------------------------------------------------------------------------------------------------------------------------------------------------------------------------------------------------------------------------------------------------------------------------------------------------------------------------------------------------------------------------------------------------------------------------------------------------------------------------------------------------------------------------------------------------------------------------------------------------------------------------------------------------------------------------------------------------------------------------------------------------------------------------------------------------------------------------------------------------------------------------------------------------------------------------------------------------------------------------------------------------------------------------------------------------------------------------------------------------------------------------------------------------------------------------------------------------------------------------------------------------------------------------------------------------------------------------------------------------------------------------------------------------------------------------------------------------------------------------------------------------------------------------------------------------------------------------------------------------------------------------------------------------------------------------------------------------------------------------------------------------------------------------------------------------------------------------------------------------------------------------------------------------------------------------------------------------------------------------------------------------------------------------------------------------------------------------------------------------------------------------------------------------------------------------------------------------------------------------------------------------------------------------------------------------------------------------------------------------------------------------------------------------------------------------------------------------------------------------------------------------------------------------------------------------------------------------------------------------------------------------------------------------------------------------------------------------------------------------------------------------------------------------------|-----------------------------------------------------------------------------|
| 1 AND 2 AND 3 AND 4                             | PubMed (Jan 21, 2016)<br><a href="https://www.ncbi.nlm.nih.gov/pubmed/">https://www.ncbi.nlm.nih.gov/pubmed/</a>                                                                                                                                                                                                                                                                                                                                                                                                                                                                                                                                                                                                                                                                                                                                                                                                                                                                                                                                                                                                                                                                                                                                                                                                                                                                                                                                                                                                                                                                                                                                                                                                                                                                                                                                                                                                                                                                                                                                                                                                                                                                                                                                                                                                                                                                                                                                                                                                                                                                                                                                                                                                                                                                                                                                                                                                                                                                                                                                                                                                                                                                                                                                                                                                                                                                                                                                                                                                                                                                                                                                                                                                                                                                                                                                                                                                                                                                                                                                                                                                                                                                                                                                                                                                                                                                                                                                                                                                                                                                                                                                                                                                                                                                                                                                                                                                                                                                                                                                                                                                                                                                                                                                                                                                                                                                                                                                                                                                                                                                                                                                                                                                                                                                                                                                                                                                                                                                                                                                                                                                                                                                                                                                                                                                                                                                                                                                                                                                                                                                                                                                                                                                                                                                                                                                                                                                                                                                                                                                                                                                                                                                                                                                                                                                                                                                                                                                                                                                                                                                                                                                                                                                                                                                      | Title/Abstract, MeSH Major Topics (none) [only "Title/Abstract" for set #4] |
| Results                                         | Search text                                                                                                                                                                                                                                                                                                                                                                                                                                                                                                                                                                                                                                                                                                                                                                                                                                                                                                                                                                                                                                                                                                                                                                                                                                                                                                                                                                                                                                                                                                                                                                                                                                                                                                                                                                                                                                                                                                                                                                                                                                                                                                                                                                                                                                                                                                                                                                                                                                                                                                                                                                                                                                                                                                                                                                                                                                                                                                                                                                                                                                                                                                                                                                                                                                                                                                                                                                                                                                                                                                                                                                                                                                                                                                                                                                                                                                                                                                                                                                                                                                                                                                                                                                                                                                                                                                                                                                                                                                                                                                                                                                                                                                                                                                                                                                                                                                                                                                                                                                                                                                                                                                                                                                                                                                                                                                                                                                                                                                                                                                                                                                                                                                                                                                                                                                                                                                                                                                                                                                                                                                                                                                                                                                                                                                                                                                                                                                                                                                                                                                                                                                                                                                                                                                                                                                                                                                                                                                                                                                                                                                                                                                                                                                                                                                                                                                                                                                                                                                                                                                                                                                                                                                                                                                                                                                           |                                                                             |
| 1,306                                           | <p>(((((("Domestic water"[Title/Abstract] OR "Drinking water"[Title/Abstract] OR "Potable water"[Title/Abstract] OR "Tap water"[Title/Abstract] OR "Water consumption"[Title/Abstract] OR "Well water"[Title/Abstract])) OR ("Domestic water" OR "Drinking water" OR "Potable water" OR "Tap water" OR "Water consumption" OR "Well water"[MeSH Major Topic])) AND (((Boil[Title/Abstract] OR Boiled[Title/Abstract] OR Boiling[Title/Abstract] OR Decontamination[Title/Abstract] OR Disinfect[Title/Abstract] OR Disinfectant[Title/Abstract] OR Disinfection[Title/Abstract] OR Domestic[Title/Abstract] OR Household[Title/Abstract] OR Inactivation[Title/Abstract] OR Pasteurise[Title/Abstract] OR Pasteurised[Title/Abstract] OR Pasteurize[Title/Abstract] OR Pasteurized[Title/Abstract] OR "Point of use"[Title/Abstract] OR Point-of-use[Title/Abstract] OR "POU"[Title/Abstract] OR Purification[Title/Abstract] OR Purified[Title/Abstract] OR Purify[Title/Abstract] OR Residential[Title/Abstract] OR "Safe water"[Title/Abstract] OR Treat[Title/Abstract] OR Treated[Title/Abstract] OR Treating[Title/Abstract] OR Treatment[Title/Abstract] OR "Water disinfection"[Title/Abstract] OR "Water purification"[Title/Abstract] OR "Water quality"[Title/Abstract] OR "Water treatment"[Title/Abstract])) OR (Boil OR Boiled OR Boiling OR Decontamination OR Disinfect OR Disinfectant OR Disinfection OR Domestic OR Household OR Inactivation OR Pasteurise OR Pasteurised OR Pasteurize OR Pasteurized OR "Point of use" OR Point-of-use OR "POU" OR Purification OR Purified OR Purify OR Residential OR "Safe water" OR Treat OR Treated OR Treating OR Treatment OR "Water disinfection" OR "Water purification" OR "Water quality" OR "Water treatment"[MeSH Major Topic])) AND (((("Acute gastrointestinal"[Title/Abstract] OR "AGI" [Title/Abstract] OR "AGII" [Title/Abstract] OR "HCGI" [Title/Abstract] OR "Highly credible gastrointestinal" [Title/Abstract] OR <i>Campylobacter</i>[Title/Abstract] OR Cholera[Title/Abstract] OR <i>Cholerae</i>[Title/Abstract] OR <i>Cryptosporidium</i>[Title/Abstract] OR Diarrhea[Title/Abstract] OR Diarrheal[Title/Abstract] OR "Diarrheal disease" [Title/Abstract] OR Diarrhoea[Title/Abstract] OR Diarrheal[Title/Abstract] OR "Diarrheal disease" [Title/Abstract] OR Dysentery[Title/Abstract] OR "E. coli" [Title/Abstract] OR Enteric[Title/Abstract] OR "Enteric virus" [Title/Abstract] OR "Enteric viruses" [Title/Abstract] OR Enterovirus[Title/Abstract] OR Enteroviruses[Title/Abstract] OR "E. coli" [Title/Abstract] OR "Escherichia coli" [Title/Abstract] OR Gastrointestinal[Title/Abstract] OR "Gastro intestinal" [Title/Abstract] OR Gastro-enteric[Title/Abstract] OR <i>Giardia</i>[Title/Abstract] OR Helicobacter[Title/Abstract] OR Helminth [Title/Abstract] OR Hepatitis[Title/Abstract] OR Intestinal[Title/Abstract] OR Norovirus[Title/Abstract] OR "Norwold-like virus" [Title/Abstract] OR Rotavirus[Title/Abstract] OR <i>Salmonella</i>[Title/Abstract] OR Shigella[Title/Abstract] OR "Vibrio cholera" [Title/Abstract] OR "Vibrio cholerae" [Title/Abstract] OR Waterborne[Title/Abstract] OR Water-borne[Title/Abstract] OR "Waterborne pathogen" [Title/Abstract] OR "Waterborne pathogens"[Title/Abstract])) OR ("Acute gastrointestinal" OR "AGI" OR "AGII" OR "HCGI" OR "Highly credible gastrointestinal" OR <i>Campylobacter</i> OR Cholera OR <i>Cholerae</i> OR <i>Cryptosporidium</i> OR Diarrhea OR Diarrheal OR "Diarrheal disease" OR Diarrhoea OR Diarrheal OR "Diarrheal disease" OR Dysentery OR "E. coli" OR Enteric OR "Enteric virus" OR "Enteric viruses" OR Enterovirus OR Enteroviruses OR "E. coli" OR "Escherichia coli" OR Gastrointestinal OR "Gastro intestinal" OR Gastro-enteric OR <i>Giardia</i> OR Helicobacter OR Helminth OR Hepatitis OR Intestinal OR Norovirus OR "Norwold-like virus" OR Rotavirus OR <i>Salmonella</i> OR Shigella OR "Vibrio cholera" OR "Vibrio cholerae" OR Waterborne OR Water-borne OR "Waterborne pathogen" OR "Waterborne pathogens"[MeSH Major Topic])) AND ((Afghanistan[Title/Abstract] OR Algeria[Title/Abstract] OR Angola[Title/Abstract] OR Anguilla[Title/Abstract] OR Antigua[Title/Abstract] OR Barbuda[Title/Abstract] OR Argentina[Title/Abstract] OR Armenia[Title/Abstract] OR Armenian[Title/Abstract] OR Aruba[Title/Abstract] OR Azerbaijan[Title/Abstract] OR Bahamas[Title/Abstract] OR Bahrain[Title/Abstract] OR Bangladesh[Title/Abstract] OR Barbados[Title/Abstract] OR Benin[Title/Abstract] OR Byelarus[Title/Abstract] OR Byelorussian[Title/Abstract] OR Belarus[Title/Abstract] OR Belize[Title/Abstract] OR Bhutan [Title/Abstract] OR Bolivia[Title/Abstract] OR Botswana[Title/Abstract] OR Brazil[Title/Abstract] OR Brunei[Title/Abstract] OR Burkina Faso[Title/Abstract] OR "Burkina Fasso"[Title/Abstract] OR "Upper Volta"[Title/Abstract] OR Burundi[Title/Abstract] OR Urundi[Title/Abstract] OR Cambodia[Title/Abstract] OR "Khmer Republic"[Title/Abstract] OR Kampuchea[Title/Abstract] OR Cameroon[Title/Abstract] OR Camerons[Title/Abstract] OR Cameron[Title/Abstract] OR Camerons[Title/Abstract] OR "Cape Verde"[Title/Abstract] OR "Cayman Islands"[Title/Abstract] OR "Central African Republic"[Title/Abstract] OR Chad[Title/Abstract] OR Chile[Title/Abstract] OR China[Title/Abstract] OR Colombia[Title/Abstract] OR Comoros[Title/Abstract] OR "Comoro Islands"[Title/Abstract] OR Comores[Title/Abstract] OR Mayotte [Title/Abstract] OR Congo[Title/Abstract] OR Zaire[Title/Abstract] OR "Cook Islands"[Title/Abstract] OR "Costa Rica"[Title/Abstract] OR "Cote d'Ivoire"[Title/Abstract] OR "Ivory Coast"[Title/Abstract] OR Croatia[Title/Abstract] OR Cuba[Title/Abstract] OR Cyprus[Title/Abstract] OR Djibouti[Title/Abstract] OR "French Somaliland"[Title/Abstract] OR Dominica[Title/Abstract] OR "Dominican Republic"[Title/Abstract] OR "East Timor"[Title/Abstract] OR "East Timur"[Title/Abstract] OR "Timor Leste"[Title/Abstract] OR Ecuador[Title/Abstract] OR Egypt[Title/Abstract] OR "United Arab Republic"[Title/Abstract] OR "El Salvador"[Title/Abstract] OR Eritrea[Title/Abstract] OR Ethiopia[Title/Abstract] OR "Falkland Islands"[Title/Abstract] OR "Las Malvinas"[Title/Abstract] OR Fiji[Title/Abstract] OR Gabon[Title/Abstract] OR "Gabonese Republic"[Title/Abstract] OR Gambia[Title/Abstract] OR Gaza[Title/Abstract] OR "Georgia Republic"[Title/Abstract] OR "Georgian Republic"[Title/Abstract] OR Ghana[Title/Abstract] OR "Gold Coast"[Title/Abstract] OR Greece [Title/Abstract] OR Grenada[Title/Abstract] OR Guatemala[Title/Abstract] OR Guinea[Title/Abstract] OR Guam[Title/Abstract] OR Guadeloupe[Title/Abstract] OR Guiana[Title/Abstract] OR Guyana[Title/Abstract] OR Haiti[Title/Abstract] OR Honduras[Title/Abstract] OR "Hong Kong"[Title/Abstract] OR India[Title/Abstract] OR Maldives[Title/Abstract] OR Indonesia[Title/Abstract] OR Iran[Title/Abstract] OR Iraq[Title/Abstract] OR Jamaica[Title/Abstract] OR Jordan[Title/Abstract] OR Kazakhstan[Title/Abstract] OR Kazakh[Title/Abstract] OR Kenya[Title/Abstract] OR Kiribati[Title/Abstract] OR Korea[Title/Abstract] OR Kosovo[Title/Abstract] OR Kuwait[Title/Abstract] OR Kyrgyzstan[Title/Abstract] OR Kirghiz[Title/Abstract] OR Kirghizstan[Title/Abstract] OR "Lao PDR"[Title/Abstract] OR Laos[Title/Abstract] OR Lebanon[Title/Abstract] OR Lesotho[Title/Abstract] OR Basutoland[Title/Abstract] OR Liberia[Title/Abstract] OR Libya[Title/Abstract] OR Macau[Title/Abstract] OR Madagascar [Title/Abstract] OR "Malagasy Republic"[Title/Abstract] OR Maldives[Title/Abstract] OR Malaysia[Title/Abstract] OR</p> |                                                                             |

(continued)

SUPPLEMENTAL TABLE 2

Continued

| Boolean operators used between search term sets                                                                                                                                                                                                                                                                                                                                                                                                                                                                                                                                                                                                                                                                                                                                                                                                                                                                                                                                                                                                                                                                                                                                                                                                                                                                                                                                                                                                                                                                                                                                                                                                                                                                                                                                                                                                                                                                                                                                                                                                                                                                                                                                                                                                                                                                                                                                                                                                                                                                                                                                                                                                                                                                                                                                                                                                                                                                                                                                                                                                                                                                                                                                                                                                                                                                                                                                                                                                                                                                                           | Database searched (date of search)                                                                               | Fields searched (limitations)                                                  |
|-------------------------------------------------------------------------------------------------------------------------------------------------------------------------------------------------------------------------------------------------------------------------------------------------------------------------------------------------------------------------------------------------------------------------------------------------------------------------------------------------------------------------------------------------------------------------------------------------------------------------------------------------------------------------------------------------------------------------------------------------------------------------------------------------------------------------------------------------------------------------------------------------------------------------------------------------------------------------------------------------------------------------------------------------------------------------------------------------------------------------------------------------------------------------------------------------------------------------------------------------------------------------------------------------------------------------------------------------------------------------------------------------------------------------------------------------------------------------------------------------------------------------------------------------------------------------------------------------------------------------------------------------------------------------------------------------------------------------------------------------------------------------------------------------------------------------------------------------------------------------------------------------------------------------------------------------------------------------------------------------------------------------------------------------------------------------------------------------------------------------------------------------------------------------------------------------------------------------------------------------------------------------------------------------------------------------------------------------------------------------------------------------------------------------------------------------------------------------------------------------------------------------------------------------------------------------------------------------------------------------------------------------------------------------------------------------------------------------------------------------------------------------------------------------------------------------------------------------------------------------------------------------------------------------------------------------------------------------------------------------------------------------------------------------------------------------------------------------------------------------------------------------------------------------------------------------------------------------------------------------------------------------------------------------------------------------------------------------------------------------------------------------------------------------------------------------------------------------------------------------------------------------------------------|------------------------------------------------------------------------------------------------------------------|--------------------------------------------------------------------------------|
| 1 AND 2 AND 3 AND 4                                                                                                                                                                                                                                                                                                                                                                                                                                                                                                                                                                                                                                                                                                                                                                                                                                                                                                                                                                                                                                                                                                                                                                                                                                                                                                                                                                                                                                                                                                                                                                                                                                                                                                                                                                                                                                                                                                                                                                                                                                                                                                                                                                                                                                                                                                                                                                                                                                                                                                                                                                                                                                                                                                                                                                                                                                                                                                                                                                                                                                                                                                                                                                                                                                                                                                                                                                                                                                                                                                                       | PubMed (Jan 21, 2016)<br><a href="https://www.ncbi.nlm.nih.gov/pubmed/">https://www.ncbi.nlm.nih.gov/pubmed/</a> | Title/Abstract, MeSH Major Topics<br>(none) [only "Title/Abstract" for set #4] |
| Results                                                                                                                                                                                                                                                                                                                                                                                                                                                                                                                                                                                                                                                                                                                                                                                                                                                                                                                                                                                                                                                                                                                                                                                                                                                                                                                                                                                                                                                                                                                                                                                                                                                                                                                                                                                                                                                                                                                                                                                                                                                                                                                                                                                                                                                                                                                                                                                                                                                                                                                                                                                                                                                                                                                                                                                                                                                                                                                                                                                                                                                                                                                                                                                                                                                                                                                                                                                                                                                                                                                                   | Search text                                                                                                      |                                                                                |
| <p>Malaya[Title/Abstract] OR Malay[Title/Abstract] OR Sabah[Title/Abstract] OR Sarawak[Title/Abstract] OR Malawi[Title/Abstract] OR Nyasaland[Title/Abstract] OR Mali[Title/Abstract] OR Malta[Title/Abstract] OR "Marshall Islands"[Title/Abstract] OR Martinique[Title/Abstract] OR Mauritania[Title/Abstract] OR Mauritius[Title/Abstract] OR "Agalega Islands"[Title/Abstract] OR Mexico[Title/Abstract] OR Micronesia[Title/Abstract] OR "Middle East"[Title/Abstract] OR Mongolia[Title/Abstract] OR Montserrat[Title/Abstract] OR Morocco[Title/Abstract] OR Ifni[Title/Abstract] OR Mozambique[Title/Abstract] OR Myanmar[Title/Abstract] OR Myanma[Title/Abstract] OR Burma[Title/Abstract] OR Namibia[Title/Abstract] OR Nauru[Title/Abstract] OR Nepal[Title/Abstract] OR Niui[Title/Abstract] OR "Netherlands Antilles"[Title/Abstract] OR "New Caledonia"[Title/Abstract] OR Nicaragua[Title/Abstract] OR Niger[Title/Abstract] OR Nigeria[Title/Abstract] OR "Northern Mariana Islands"[Title/Abstract] OR Oman[Title/Abstract] OR Mayotte[Title/Abstract] OR Muscat[Title/Abstract] OR Pakistan[Title/Abstract] OR Palau[Title/Abstract] OR Palestine[Title/Abstract] OR Panama[Title/Abstract] OR Paraguay[Title/Abstract] OR Peru[Title/Abstract] OR Philippines[Title/Abstract] OR Philipines[Title/Abstract] OR Phillipines[Title/Abstract] OR Phillippines[Title/Abstract] OR Polynesia[Title/Abstract] OR "Puerto Rico"[Title/Abstract] OR Qatar[Title/Abstract] OR Reunion[Title/Abstract] OR Rwanda[Title/Abstract] OR Ruanda[Title/Abstract] OR "Saint Kitts"[Title/Abstract] OR "St Kitts"[Title/Abstract] OR Nevis[Title/Abstract] OR "Saint Lucia"[Title/Abstract] OR "St Lucia"[Title/Abstract] OR "Saint Vincent"[Title/Abstract] OR "St Vincent"[Title/Abstract] OR Grenadines[Title/Abstract] OR Samoa[Title/Abstract] OR "Samoan Islands"[Title/Abstract] OR "Navigator Island"[Title/Abstract] OR "Navigator Islands"[Title/Abstract] OR "Sao Tome"[Title/Abstract] OR "Saudi Arabia"[Title/Abstract] OR Senegal[Title/Abstract] OR Serbia[Title/Abstract] OR Montenegro[Title/Abstract] OR Seychelles[Title/Abstract] OR "Sierra Leone"[Title/Abstract] OR Singapore[Title/Abstract] OR "Sri Lanka"[Title/Abstract] OR Ceylon[Title/Abstract] OR "Solomon Islands"[Title/Abstract] OR Somalia[Title/Abstract] OR "South Africa"[Title/Abstract] OR Sudan[Title/Abstract] OR Suriname[Title/Abstract] OR Surinam[Title/Abstract] OR Swaziland[Title/Abstract] OR Syria[Title/Abstract] OR Tajikistan[Title/Abstract] OR Tadzhikistan[Title/Abstract] OR Tadjikistan[Title/Abstract] OR Tadzhiq[Title/Abstract] OR Tanzania[Title/Abstract] OR Thailand[Title/Abstract] OR Togo[Title/Abstract] OR "Togolese Republic"[Title/Abstract] OR Tokelau[Title/Abstract] OR Tonga[Title/Abstract] OR Trinidad[Title/Abstract] OR Tobago[Title/Abstract] OR Tunisia[Title/Abstract] OR Turkey[Title/Abstract] OR Turkmenistan[Title/Abstract] OR Turkmen[Title/Abstract] OR "Turks Caicos"[Title/Abstract] OR "Tuvalu Uganda"[Title/Abstract] OR "United Arab Emirates"[Title/Abstract] OR Uruguay[Title/Abstract] OR Uzbekistan[Title/Abstract] OR Uzbek[Title/Abstract] OR Vanuatu[Title/Abstract] OR "New Hebrides"[Title/Abstract] OR Venezuela[Title/Abstract] OR Vietnam[Title/Abstract] OR "Viet Nam"[Title/Abstract] OR "Virgin Islands"[Title/Abstract] OR "West Bank"[Title/Abstract] OR Yemen[Title/Abstract] OR Yugoslavia[Title/Abstract] OR Zambia[Title/Abstract] OR Zimbabwe[Title/Abstract])</p> |                                                                                                                  |                                                                                |

SUPPLEMENTAL TABLE 3  
Search terms, notes, and results for EMBASE (and EMBASE Classic)

| Boolean operators used between search term sets | Database searched (date of search)                                                                                                                                                                                                                                                                                                                                                                                                                                                                                                                                                                                                                                                                                                                                                                                                                                                                                                                                                                                                                                                                                                                                                                                                                                                                                                                                                                                                                                                                                                                                                                                                                                                                                                                                                                                                                                                                                                                                                                                                                                                                                                                                                                                                                                                                                                                                                                                                                                                                                                                                                                                                                                                                                                                                                                                                                                                                                                                                                                                                                                                                                                                                                                                                                                                                                                                                                                                                                                                                                                                                                                                                                                                                                                                                                                                                                                                                                                                                                                                                                                                                                                                                                                                                                                                                                                                                                                                                                                                                                                                                                                                                                                                                                                                                                                                                                                                                                                                                                                                                                                                                                                                                                                                                                                                                                                                                                                                                                                                                                                                                                                                                                                                                                                                                                                                                                                                                                                                                                                                                                                                                                                                                                                                                                                                                                                                                                                                                                                                                                                                                                                                                                                                                                                                                                                                                                                                                                                                                                                                                                                                                                                                                                                                                                                                                                                                                                                                                                                                                                                                                              | Fields searched (limitations)         |
|-------------------------------------------------|---------------------------------------------------------------------------------------------------------------------------------------------------------------------------------------------------------------------------------------------------------------------------------------------------------------------------------------------------------------------------------------------------------------------------------------------------------------------------------------------------------------------------------------------------------------------------------------------------------------------------------------------------------------------------------------------------------------------------------------------------------------------------------------------------------------------------------------------------------------------------------------------------------------------------------------------------------------------------------------------------------------------------------------------------------------------------------------------------------------------------------------------------------------------------------------------------------------------------------------------------------------------------------------------------------------------------------------------------------------------------------------------------------------------------------------------------------------------------------------------------------------------------------------------------------------------------------------------------------------------------------------------------------------------------------------------------------------------------------------------------------------------------------------------------------------------------------------------------------------------------------------------------------------------------------------------------------------------------------------------------------------------------------------------------------------------------------------------------------------------------------------------------------------------------------------------------------------------------------------------------------------------------------------------------------------------------------------------------------------------------------------------------------------------------------------------------------------------------------------------------------------------------------------------------------------------------------------------------------------------------------------------------------------------------------------------------------------------------------------------------------------------------------------------------------------------------------------------------------------------------------------------------------------------------------------------------------------------------------------------------------------------------------------------------------------------------------------------------------------------------------------------------------------------------------------------------------------------------------------------------------------------------------------------------------------------------------------------------------------------------------------------------------------------------------------------------------------------------------------------------------------------------------------------------------------------------------------------------------------------------------------------------------------------------------------------------------------------------------------------------------------------------------------------------------------------------------------------------------------------------------------------------------------------------------------------------------------------------------------------------------------------------------------------------------------------------------------------------------------------------------------------------------------------------------------------------------------------------------------------------------------------------------------------------------------------------------------------------------------------------------------------------------------------------------------------------------------------------------------------------------------------------------------------------------------------------------------------------------------------------------------------------------------------------------------------------------------------------------------------------------------------------------------------------------------------------------------------------------------------------------------------------------------------------------------------------------------------------------------------------------------------------------------------------------------------------------------------------------------------------------------------------------------------------------------------------------------------------------------------------------------------------------------------------------------------------------------------------------------------------------------------------------------------------------------------------------------------------------------------------------------------------------------------------------------------------------------------------------------------------------------------------------------------------------------------------------------------------------------------------------------------------------------------------------------------------------------------------------------------------------------------------------------------------------------------------------------------------------------------------------------------------------------------------------------------------------------------------------------------------------------------------------------------------------------------------------------------------------------------------------------------------------------------------------------------------------------------------------------------------------------------------------------------------------------------------------------------------------------------------------------------------------------------------------------------------------------------------------------------------------------------------------------------------------------------------------------------------------------------------------------------------------------------------------------------------------------------------------------------------------------------------------------------------------------------------------------------------------------------------------------------------------------------------------------------------------------------------------------------------------------------------------------------------------------------------------------------------------------------------------------------------------------------------------------------------------------------------------------------------------------------------------------------------------------------------------------------------------------------------------------------------------------------------------------------------------|---------------------------------------|
| 1 AND 2 AND 3 AND 4                             | EMBASE (Jan 21, 2016)<br><a href="https://www.elsevier.com/solutions/embase-biomedical-research">https://www.elsevier.com/solutions/embase-biomedical-research</a>                                                                                                                                                                                                                                                                                                                                                                                                                                                                                                                                                                                                                                                                                                                                                                                                                                                                                                                                                                                                                                                                                                                                                                                                                                                                                                                                                                                                                                                                                                                                                                                                                                                                                                                                                                                                                                                                                                                                                                                                                                                                                                                                                                                                                                                                                                                                                                                                                                                                                                                                                                                                                                                                                                                                                                                                                                                                                                                                                                                                                                                                                                                                                                                                                                                                                                                                                                                                                                                                                                                                                                                                                                                                                                                                                                                                                                                                                                                                                                                                                                                                                                                                                                                                                                                                                                                                                                                                                                                                                                                                                                                                                                                                                                                                                                                                                                                                                                                                                                                                                                                                                                                                                                                                                                                                                                                                                                                                                                                                                                                                                                                                                                                                                                                                                                                                                                                                                                                                                                                                                                                                                                                                                                                                                                                                                                                                                                                                                                                                                                                                                                                                                                                                                                                                                                                                                                                                                                                                                                                                                                                                                                                                                                                                                                                                                                                                                                                                              | Abstracts, Titles, Index terms (none) |
| Results                                         | Search text                                                                                                                                                                                                                                                                                                                                                                                                                                                                                                                                                                                                                                                                                                                                                                                                                                                                                                                                                                                                                                                                                                                                                                                                                                                                                                                                                                                                                                                                                                                                                                                                                                                                                                                                                                                                                                                                                                                                                                                                                                                                                                                                                                                                                                                                                                                                                                                                                                                                                                                                                                                                                                                                                                                                                                                                                                                                                                                                                                                                                                                                                                                                                                                                                                                                                                                                                                                                                                                                                                                                                                                                                                                                                                                                                                                                                                                                                                                                                                                                                                                                                                                                                                                                                                                                                                                                                                                                                                                                                                                                                                                                                                                                                                                                                                                                                                                                                                                                                                                                                                                                                                                                                                                                                                                                                                                                                                                                                                                                                                                                                                                                                                                                                                                                                                                                                                                                                                                                                                                                                                                                                                                                                                                                                                                                                                                                                                                                                                                                                                                                                                                                                                                                                                                                                                                                                                                                                                                                                                                                                                                                                                                                                                                                                                                                                                                                                                                                                                                                                                                                                                     |                                       |
| 1,329                                           | <p>(domestic water':de,ab,ti OR 'drinking water':de,ab,ti OR 'potable water':de,ab,ti OR 'tap water':de,ab,ti OR 'water consumption':de,ab,ti OR 'well water':de,ab,ti) AND (boil:de,ab,ti OR boiled:de,ab,ti OR boiling:de,ab,ti OR decontamination:de,ab,ti OR disinfect:de,ab,ti OR disinfectant:de,ab,ti OR disinfection:de,ab,ti OR domestic:de,ab,ti OR household:de,ab,ti OR inactivation:de,ab,ti OR pasteurise:de,ab,ti OR pasteurised:de,ab,ti OR pasteurize:de,ab,ti OR pasteurized:de,ab,ti OR 'point of use':de,ab,ti OR 'pou':de,ab,ti OR purification:de,ab,ti OR purified:de,ab,ti OR purify:de,ab,ti OR residential:de,ab,ti OR 'safe water':de,ab,ti OR treat:de,ab,ti OR treated:de,ab,ti OR treating:de,ab,ti OR treatment:de,ab,ti OR 'water disinfection':de,ab,ti OR 'water purification':de,ab,ti OR 'water quality':de,ab,ti OR 'water treatment':de,ab,ti) AND ('acute gastrointestinal':de,ab,ti OR 'agi':de,ab,ti OR 'agii':de,ab,ti OR 'hcgi':de,ab,ti OR 'highly credible gastrointestinal':de,ab,ti OR <i>Campylobacter</i>:de,ab,ti OR cholera:de,ab,ti OR cholerae:de,ab,ti OR cryptosporidium:de,ab,ti OR diarrhea:de,ab,ti OR diarrheal:de,ab,ti OR 'diarrheal disease':de,ab,ti OR diarrheoa:de,ab,ti OR diarrheoal:de,ab,ti OR 'diarrheoal disease':de,ab,ti OR dysentery:de,ab,ti OR enteric:de,ab,ti OR 'enteric virus':de,ab,ti OR 'enteric viruses':de,ab,ti OR enterovirus:de,ab,ti OR enteroviruses:de,ab,ti OR 'E. coli':de,ab,ti OR <i>Escherichia coli</i>:de,ab,ti OR gastrointestinal:de,ab,ti OR 'gastro intestinal':de,ab,ti OR 'gastro enteric':de,ab,ti OR <i>Giardia</i>:de,ab,ti OR helicobacter:de,ab,ti OR helminth:de,ab,ti OR hepatitis:de,ab,ti OR intestinal:de,ab,ti OR norovirus:de,ab,ti OR 'norovirus-like virus':de,ab,ti OR rotavirus:de,ab,ti OR <i>Salmonella</i>:de,ab,ti OR shigella:de,ab,ti OR 'vibrio cholera':de,ab,ti OR 'vibrio cholerae':de,ab,ti OR waterborne:de,ab,ti OR 'water borne':de,ab,ti OR 'waterborne pathogen':de,ab,ti OR 'waterborne pathogens':de,ab,ti) AND (afghanistan:de,ab,ti OR algeria:de,ab,ti OR angola:de,ab,ti OR anguilla:de,ab,ti OR antigua:de,ab,ti OR barbuda:de,ab,ti OR argentina:de,ab,ti OR armenia:de,ab,ti OR armenian:de,ab,ti OR aruba:de,ab,ti OR azerbaijan:de,ab,ti OR bahamas:de,ab,ti OR bahrain:de,ab,ti OR bangladesh:de,ab,ti OR barbados:de,ab,ti OR benin:de,ab,ti OR byelarus:de,ab,ti OR byelorussian:de,ab,ti OR belarus:de,ab,ti OR belorussian:de,ab,ti OR belorussia:de,ab,ti OR belize:de,ab,ti OR bhutan:de,ab,ti OR bolivia:de,ab,ti OR botswana:de,ab,ti OR brazil:de,ab,ti OR brunei:de,ab,ti OR burkina:de,ab,ti AND faso:de,ab,ti OR 'burkina fasso':de,ab,ti OR 'upper volta':de,ab,ti OR burundi:de,ab,ti OR urundi:de,ab,ti OR cambodia:de,ab,ti OR 'khmer republic':de,ab,ti OR kampuchea:de,ab,ti OR cameroon:de,ab,ti OR cameroons:de,ab,ti OR cameron:de,ab,ti OR camerons:de,ab,ti OR 'cape verde':de,ab,ti OR 'cayman islands':de,ab,ti OR 'central african republic':de,ab,ti OR chad:de,ab,ti OR chile:de,ab,ti OR china:de,ab,ti OR colombia:de,ab,ti OR comoros:de,ab,ti OR 'comoro islands':de,ab,ti OR comores:de,ab,ti OR congo:de,ab,ti OR zaire:de,ab,ti OR 'cook islands':de,ab,ti OR 'costa rica':de,ab,ti OR 'cote divoire':de,ab,ti OR 'ivory coast':de,ab,ti OR croatia:de,ab,ti OR cuba:de,ab,ti OR cyprus:de,ab,ti OR djibouti:de,ab,ti OR 'french somaliland':de,ab,ti OR dominica:de,ab,ti OR 'dominican republic':de,ab,ti OR 'east timor':de,ab,ti OR 'east timur':de,ab,ti OR 'timor leste':de,ab,ti OR ecuador:de,ab,ti OR egypt:de,ab,ti OR 'united arab republic':de,ab,ti OR 'el salvador':de,ab,ti OR eritrea:de,ab,ti OR ethiopia:de,ab,ti OR 'falkland islands':de,ab,ti OR 'las malvinas':de,ab,ti OR fiji:de,ab,ti OR gabon:de,ab,ti OR 'gabonese republic':de,ab,ti OR gambia:de,ab,ti OR gaza:de,ab,ti OR 'georgia republic':de,ab,ti OR 'georgian republic':de,ab,ti OR ghana:de,ab,ti OR 'gold coast':de,ab,ti OR greece:de,ab,ti OR grenada:de,ab,ti OR guatemala:de,ab,ti OR guinea:de,ab,ti OR guam:de,ab,ti OR guadeloupe:de,ab,ti OR guiana:de,ab,ti OR guyana:de,ab,ti OR haiti:de,ab,ti OR honduras:de,ab,ti OR 'hong kong':de,ab,ti OR india:de,ab,ti OR indonesia:de,ab,ti OR iran:de,ab,ti OR iraq:de,ab,ti OR jamaica:de,ab,ti OR jordan:de,ab,ti OR kazakhstan:de,ab,ti OR kazakh:de,ab,ti OR kenya:de,ab,ti OR kiribati:de,ab,ti OR korea:de,ab,ti OR kosovo:de,ab,ti OR kuwait:de,ab,ti OR kyrgyzstan:de,ab,ti OR kirghizia:de,ab,ti OR 'kyrgyz republic':de,ab,ti OR kirghiz:de,ab,ti OR kirgizstan:de,ab,ti OR 'lao pdr':de,ab,ti OR laos:de,ab,ti OR lebanon:de,ab,ti OR lesotho:de,ab,ti OR basutoland:de,ab,ti OR liberia:de,ab,ti OR libya:de,ab,ti OR macau:de,ab,ti OR madagascar:de,ab,ti OR 'malagasy republic':de,ab,ti OR maldives:de,ab,ti OR malaysia:de,ab,ti OR malaya:de,ab,ti OR malay:de,ab,ti OR sabah:de,ab,ti OR sarawak:de,ab,ti OR malawi:de,ab,ti OR nyasaland:de,ab,ti OR mali:de,ab,ti OR malta:de,ab,ti OR 'marshall islands':de,ab,ti OR martinique:de,ab,ti OR mauritania:de,ab,ti OR mauritius:de,ab,ti OR 'agalega islands':de,ab,ti OR mexico:de,ab,ti OR micronesia:de,ab,ti OR 'middle east':de,ab,ti OR mongolia:de,ab,ti OR montserrat:de,ab,ti OR morocco:de,ab,ti OR ifni:de,ab,ti OR mozambique:de,ab,ti OR myanmar:de,ab,ti OR myanma:de,ab,ti OR burma:de,ab,ti OR namibia:de,ab,ti OR nauru:de,ab,ti OR nepal:de,ab,ti OR niui:de,ab,ti OR 'netherlands antilles':de,ab,ti OR 'new caledonia':de,ab,ti OR nicaragua:de,ab,ti OR niger:de,ab,ti OR nigeria:de,ab,ti OR 'northern mariana islands':de,ab,ti OR oman:de,ab,ti OR mayotte:de,ab,ti OR muscat:de,ab,ti OR pakistan:de,ab,ti OR palau:de,ab,ti OR palestine:de,ab,ti OR panama:de,ab,ti OR paraguay:de,ab,ti OR peru:de,ab,ti OR philippines:de,ab,ti OR philippines:de,ab,ti OR phillippines:de,ab,ti OR philippines:de,ab,ti OR polynesia:de,ab,ti OR 'puerto rico':de,ab,ti OR qatar:de,ab,ti OR reunion:de,ab,ti OR rrwanda:de,ab,ti OR ruanda:de,ab,ti OR 'saint kitts':de,ab,ti OR 'st kitts':de,ab,ti OR nevis:de,ab,ti OR 'saint lucia':de,ab,ti OR 'st lucia':de,ab,ti OR 'saint vincent':de,ab,ti OR 'st vincent':de,ab,ti OR grenadines:de,ab,ti OR samoa:de,ab,ti OR 'samoan islands':de,ab,ti OR 'navigator island':de,ab,ti OR 'navigator islands':de,ab,ti OR 'sao tome':de,ab,ti OR 'saudi arabia':de,ab,ti OR senegal:de,ab,ti OR serbia:de,ab,ti OR montenegro:de,ab,ti OR seychelles:de,ab,ti OR 'sierra leone':de,ab,ti OR singapore:de,ab,ti OR 'sri lanka':de,ab,ti OR ceylon:de,ab,ti OR 'solomon islands':de,ab,ti OR somalia:de,ab,ti OR 'south africa':de,ab,ti OR sudan:de,ab,ti OR suriname:de,ab,ti OR surinam:de,ab,ti OR swaziland:de,ab,ti OR syria:de,ab,ti OR tajikistan:de,ab,ti OR tadjikistan:de,ab,ti OR tadjikistan:de,ab,ti OR tadjik:de,ab,ti OR tanzania:de,ab,ti OR thailand:de,ab,ti OR togo:de,ab,ti OR 'togolese republic':de,ab,ti OR tokelau:de,ab,ti OR tonga:de,ab,ti OR trinidad:de,ab,ti OR tobago:de,ab,ti OR tunisia:de,ab,ti OR turkey:de,ab,ti OR turkmenistan:de,ab,ti OR turkmen:de,ab,ti OR 'turks caicos':de,ab,ti OR 'tuvalu uganda':de,ab,ti OR 'united arab emirates':de,ab,ti OR uruguay:de,ab,ti OR uzbekistan:de,ab,ti OR uzbek:de,ab,ti OR vanuatu:de,ab,ti OR 'new hebrides':de,ab,ti OR venezuela:de,ab,ti OR vietnam:de,ab,ti OR 'viet nam':de,ab,ti OR 'virgin islands':de,ab,ti OR 'west bank':de,ab,ti OR yemen:de,ab,ti OR yugoslavia:de,ab,ti OR zambia:de,ab,ti OR zimbabwe:de,ab,ti)</p> |                                       |

SUPPLEMENTAL TABLE 4  
Search terms, notes, and results for Web of Science

| Boolean operators used between search-term sets | Database searched (date of search)                                                                                                                                                                                                                                                                                                                                                                                                                                                                                                                                                                                                                                                                                                                                                                                                                                                                                                                                                                                                                                                                                                                                                                                                                                                                                                                                                                                                                                                                                                                                                                                                                                                                                                                                                                                                                                                                                                                                                                                                                                                                                                                                                                                                                                                                                                                                                                                                                                                                                                                                                                                                                                                                                                                                                                                                                                                                                                                                                                                                                                                                                                                                                                                                                                                                                                                                                                                                                                                                                                                                                                                                                                                                                                                                                                                                                                                                                                                                                                                                                                                                                                                                                                                                                                                                                                                                                                                                                                                                                                                                                                                                                                                                                                      | Fields searched (limitations)         |
|-------------------------------------------------|-----------------------------------------------------------------------------------------------------------------------------------------------------------------------------------------------------------------------------------------------------------------------------------------------------------------------------------------------------------------------------------------------------------------------------------------------------------------------------------------------------------------------------------------------------------------------------------------------------------------------------------------------------------------------------------------------------------------------------------------------------------------------------------------------------------------------------------------------------------------------------------------------------------------------------------------------------------------------------------------------------------------------------------------------------------------------------------------------------------------------------------------------------------------------------------------------------------------------------------------------------------------------------------------------------------------------------------------------------------------------------------------------------------------------------------------------------------------------------------------------------------------------------------------------------------------------------------------------------------------------------------------------------------------------------------------------------------------------------------------------------------------------------------------------------------------------------------------------------------------------------------------------------------------------------------------------------------------------------------------------------------------------------------------------------------------------------------------------------------------------------------------------------------------------------------------------------------------------------------------------------------------------------------------------------------------------------------------------------------------------------------------------------------------------------------------------------------------------------------------------------------------------------------------------------------------------------------------------------------------------------------------------------------------------------------------------------------------------------------------------------------------------------------------------------------------------------------------------------------------------------------------------------------------------------------------------------------------------------------------------------------------------------------------------------------------------------------------------------------------------------------------------------------------------------------------------------------------------------------------------------------------------------------------------------------------------------------------------------------------------------------------------------------------------------------------------------------------------------------------------------------------------------------------------------------------------------------------------------------------------------------------------------------------------------------------------------------------------------------------------------------------------------------------------------------------------------------------------------------------------------------------------------------------------------------------------------------------------------------------------------------------------------------------------------------------------------------------------------------------------------------------------------------------------------------------------------------------------------------------------------------------------------------------------------------------------------------------------------------------------------------------------------------------------------------------------------------------------------------------------------------------------------------------------------------------------------------------------------------------------------------------------------------------------------------------------------------------------------------------|---------------------------------------|
| 1 AND 2 AND 3 AND 4                             | Web of Science (Jan 21, 2016)<br><a href="http://apps.webofknowledge.com/">http://apps.webofknowledge.com/</a> [Web of Science database only]                                                                                                                                                                                                                                                                                                                                                                                                                                                                                                                                                                                                                                                                                                                                                                                                                                                                                                                                                                                                                                                                                                                                                                                                                                                                                                                                                                                                                                                                                                                                                                                                                                                                                                                                                                                                                                                                                                                                                                                                                                                                                                                                                                                                                                                                                                                                                                                                                                                                                                                                                                                                                                                                                                                                                                                                                                                                                                                                                                                                                                                                                                                                                                                                                                                                                                                                                                                                                                                                                                                                                                                                                                                                                                                                                                                                                                                                                                                                                                                                                                                                                                                                                                                                                                                                                                                                                                                                                                                                                                                                                                                           | Topic (none) For search set #4: Title |
| Results                                         | Search text                                                                                                                                                                                                                                                                                                                                                                                                                                                                                                                                                                                                                                                                                                                                                                                                                                                                                                                                                                                                                                                                                                                                                                                                                                                                                                                                                                                                                                                                                                                                                                                                                                                                                                                                                                                                                                                                                                                                                                                                                                                                                                                                                                                                                                                                                                                                                                                                                                                                                                                                                                                                                                                                                                                                                                                                                                                                                                                                                                                                                                                                                                                                                                                                                                                                                                                                                                                                                                                                                                                                                                                                                                                                                                                                                                                                                                                                                                                                                                                                                                                                                                                                                                                                                                                                                                                                                                                                                                                                                                                                                                                                                                                                                                                             |                                       |
| 1,270                                           | <p>(TS=(“Domestic water” OR “Drinking water” OR “Potable water” OR “Tap water” OR “Water consumption” OR “Well water”) AND (TS=(Boil OR Boiled OR Boiling OR Decontamination OR Disinfect OR Disinfectant OR Disinfection OR Domestic OR Household OR Inactivation OR Pasteurise OR Pasteurised OR Pasteurize OR Pasteurized OR “Point of use” OR Point-of-use OR “POU” OR Purification OR Purified OR Purify OR Residential OR “Safe water” OR Treat OR Treated OR Treating OR Treatment OR “Water disinfection” OR “Water purification” OR “Water quality” OR “Water treatment”)) AND (TS=(Acute gastrointestinal OR AGI OR AGII OR HCGI OR Highly credible gastrointestinal OR <i>Campylobacter</i> OR Cholera OR Cholerae OR Cryptosporidium OR Diarrhea OR Diarrheal OR Diarrheal disease OR Diarrhoea OR Diarrheal OR Diarrheal disease OR Dysentery OR <i>E. coli</i> OR Enteric OR Enteric virus OR Enteric viruses OR Enterovirus OR Enteroviruses OR <i>E. coli</i> OR <i>Escherichia coli</i> OR Gastrointestinal OR Gastro intestinal OR Gastroenteric OR <i>Giardia</i> OR Helicobacter OR Helminth OR Hepatitis OR Intestinal OR Norovirus OR Norwold-like virus OR Rotavirus OR <i>Salmonella</i> OR Shigella OR Vibrio cholera OR Vibrio cholerae OR Waterborne OR Waterborne pathogen OR Waterborne pathogens)) AND (TI=(Afghanistan OR Algeria OR Angola OR Anguilla OR Antigua OR Barbuda OR Argentina OR Armenia OR Armenian OR Aruba OR Azerbaijan OR Bahamas OR Bahrain OR Bangladesh OR Barbados OR Benin OR Byelarus OR Byelorussian OR Belarus OR Belorussian OR Belorussia OR Belize OR Bhutan OR Bolivia OR Botswana OR Brazil OR Brunei OR Burkina Faso OR “Burkina Fasso” OR “Upper Volta” OR Burundi OR Urundi OR Cambodia OR “Khmer Republic” OR Kampuchea OR Cameroon OR Camerons OR Cameroon OR Camerons OR “Cape Verde” OR “Cayman Islands” OR “Central African Republic” OR Chad OR Chile OR China OR Colombia OR Comoros OR “Comoro Islands” OR Comores OR Mayotte OR Congo OR Zaire OR “Cook Islands” OR “Costa Rica” OR “Cote dlvoire” OR “Ivory Coast” OR Croatia OR Cuba OR Cyprus OR Djibouti OR “French Somaliland” OR Dominica OR “Dominican Republic” OR “East Timor” OR “East Timur” OR “Timor Leste” OR Ecuador OR Egypt OR “United Arab Republic” OR “El Salvador” OR Eritrea OR Ethiopia OR “Falkland Islands” OR “Las Malvinas” OR Fiji OR Gabon OR “Gabonese Republic” OR Gambia OR Gaza OR “Georgia Republic” OR “Georgian Republic” OR Ghana OR “Gold Coast” OR Greece OR Grenada OR Guatemala OR Guinea OR Guam OR Guadeloupe OR Guiana OR Guyana OR Haiti OR Honduras OR “Hong Kong” OR India OR Maldives OR Indonesia OR Iran OR Iraq OR Jamaica OR Jordan OR Kazakhstan OR Kazakh OR Kenya OR Kiribati OR Korea OR Kosovo OR Kuwait OR Kyrgyzstan OR Kirghizia OR “Kyrgyz Republic” OR Kirghiz OR Kirgizstan OR “Lao PDR” OR Laos OR Lebanon OR Lesotho OR Basutoland OR Liberia OR Libya OR Macau OR Madagascar OR “Malagasy Republic” OR Maldives OR Malaysia OR Malaya OR Malay OR Sabah OR Sarawak OR Malawi OR Nyasaland OR Mali OR Malta OR “Marshall Islands” OR Martinique OR Mauritania OR Mauritius OR “Agalega Islands” OR Mexico OR Micronesia OR “Middle East” OR Mongolia OR Montserrat OR Morocco OR Ifni OR Mozambique OR Myanmar OR Myanma OR Burma OR Namibia OR Nauru OR Nepal OR Niui OR “Netherlands Antilles” OR “New Caledonia” OR Nicaragua OR Niger OR Nigeria OR “Northern Mariana Islands” OR Oman OR Mayotte OR Muscat OR Pakistan OR Palau OR Palestine OR Panama OR Paraguay OR Peru OR Philippines OR Philipines OR Phillipines OR Philippines OR Polynesia OR “Puerto Rico” OR Qatar OR Reunion OR Rwanda OR Ruanda OR “Saint Kitts” OR “St Kitts” OR Nevis OR “Saint Lucia” OR “St Lucia” OR “Saint Vincent” OR “St Vincent” OR Grenadines OR Samoa OR “Samoa Islands” OR “Navigator Island” OR “Navigator Islands” OR “Sao Tome” OR “Saudi Arabia” OR Senegal OR Serbia OR Montenegro OR Seychelles OR “Sierra Leone” OR Singapore OR “Sri Lanka” OR Ceylon OR “Solomon Islands” OR Somalia OR “South Africa” OR Sudan OR Suriname OR Surinam OR Swaziland OR Syria OR Tajikistan OR Tadjhikistan OR Tadjikistan OR Tadjhik OR Tanzania OR Thailand OR Togo OR “Togolese Republic” OR Tokelau OR Tonga OR Trinidad OR Tobago OR Tunisia OR Turkey OR Turkmenistan OR Turkmen OR “Turks Caicos” OR “Tuvalu Uganda” OR “United Arab Emirates” OR Uruguay OR Uzbekistan OR Uzbek OR Vanuatu OR “New Hebrides” OR Venezuela OR Vietnam OR “Viet Nam” OR “Virgin Islands” OR “West Bank” OR Yemen OR Yugoslavia OR Zambia OR Zimbabwe))</p> <p>Refined by: Databases: (WOS)<br/> <b>Timespan:</b> All years.<br/> <b>Search language:</b>=Auto</p> |                                       |



SUPPLEMENTAL TABLE 5  
Search terms, notes, and results for Cochrane Library

| Boolean operators used between search-term sets | Database searched (date of search)                                                                                                                                                                                                                                                                                                                                                                                                                                                                                                                                                                                                                                                                                                                                                                                                                                                                                                                                                                                                                                                                                                                                                                                                                                                                                                                                                                                                                                                                                                                                                                                                                                                                                                                                                                                                                                                                                                                                                                                                                                                                                                                                                                                                                                                                                                                                                                                                                                                                                                                                                                                                                                                                                                                                                                                                                                                                                                                                                                                                                                                                                                                                                                                                                                                                                                                                                                                                                                                                                                                                                                                                                                                                                                                                                                                                                                                                                                                                                                                                                                                                                                                                                                                                                                                                                                                                                                                                                                                                                                                                                                                          | Fields searched (limitations)    |  |
|-------------------------------------------------|-----------------------------------------------------------------------------------------------------------------------------------------------------------------------------------------------------------------------------------------------------------------------------------------------------------------------------------------------------------------------------------------------------------------------------------------------------------------------------------------------------------------------------------------------------------------------------------------------------------------------------------------------------------------------------------------------------------------------------------------------------------------------------------------------------------------------------------------------------------------------------------------------------------------------------------------------------------------------------------------------------------------------------------------------------------------------------------------------------------------------------------------------------------------------------------------------------------------------------------------------------------------------------------------------------------------------------------------------------------------------------------------------------------------------------------------------------------------------------------------------------------------------------------------------------------------------------------------------------------------------------------------------------------------------------------------------------------------------------------------------------------------------------------------------------------------------------------------------------------------------------------------------------------------------------------------------------------------------------------------------------------------------------------------------------------------------------------------------------------------------------------------------------------------------------------------------------------------------------------------------------------------------------------------------------------------------------------------------------------------------------------------------------------------------------------------------------------------------------------------------------------------------------------------------------------------------------------------------------------------------------------------------------------------------------------------------------------------------------------------------------------------------------------------------------------------------------------------------------------------------------------------------------------------------------------------------------------------------------------------------------------------------------------------------------------------------------------------------------------------------------------------------------------------------------------------------------------------------------------------------------------------------------------------------------------------------------------------------------------------------------------------------------------------------------------------------------------------------------------------------------------------------------------------------------------------------------------------------------------------------------------------------------------------------------------------------------------------------------------------------------------------------------------------------------------------------------------------------------------------------------------------------------------------------------------------------------------------------------------------------------------------------------------------------------------------------------------------------------------------------------------------------------------------------------------------------------------------------------------------------------------------------------------------------------------------------------------------------------------------------------------------------------------------------------------------------------------------------------------------------------------------------------------------------------------------------------------------------------------------------------|----------------------------------|--|
| 1 AND 2 AND 3 AND 4                             | Cochrane Library (Jan 21, 2016) <a href="http://www.cochranelibrary.com/">http://www.cochranelibrary.com/</a>                                                                                                                                                                                                                                                                                                                                                                                                                                                                                                                                                                                                                                                                                                                                                                                                                                                                                                                                                                                                                                                                                                                                                                                                                                                                                                                                                                                                                                                                                                                                                                                                                                                                                                                                                                                                                                                                                                                                                                                                                                                                                                                                                                                                                                                                                                                                                                                                                                                                                                                                                                                                                                                                                                                                                                                                                                                                                                                                                                                                                                                                                                                                                                                                                                                                                                                                                                                                                                                                                                                                                                                                                                                                                                                                                                                                                                                                                                                                                                                                                                                                                                                                                                                                                                                                                                                                                                                                                                                                                                               | Title, abstract, keywords (none) |  |
| Results                                         | Search text                                                                                                                                                                                                                                                                                                                                                                                                                                                                                                                                                                                                                                                                                                                                                                                                                                                                                                                                                                                                                                                                                                                                                                                                                                                                                                                                                                                                                                                                                                                                                                                                                                                                                                                                                                                                                                                                                                                                                                                                                                                                                                                                                                                                                                                                                                                                                                                                                                                                                                                                                                                                                                                                                                                                                                                                                                                                                                                                                                                                                                                                                                                                                                                                                                                                                                                                                                                                                                                                                                                                                                                                                                                                                                                                                                                                                                                                                                                                                                                                                                                                                                                                                                                                                                                                                                                                                                                                                                                                                                                                                                                                                 |                                  |  |
| 71                                              | <p>(“Domestic water” OR “Drinking water” OR “Potable water” OR “Tap water” OR “Water consumption” OR “Well water”) AND (Boil OR Boiled OR Boiling OR Decontamination OR Disinfect OR Disinfectant OR Disinfection OR Domestic OR Household OR Inactivation OR Pasteurise OR Pasteurised OR Pasteurize OR Pasteurized OR “Point of use” OR Point-of-use OR “POU” OR Purification OR Purified OR Purify OR Residential OR “Safe water” OR Treat OR Treated OR Treating OR Treatment OR “Water disinfection” OR “Water purification” OR “Water quality” OR “Water treatment”) AND (“Acute gastrointestinal” OR “AGI” OR “AGII” OR “HCGI” OR “Highly credible gastrointestinal” OR <i>Campylobacter</i> OR Cholera OR Cholerae OR Cryptosporidium OR Diarrhea OR Diarrheal OR “Diarrheal disease” OR Diarrhoea OR Diarrheal OR “Diarrheal disease” OR Dysentery OR “E. coli” OR Enteric OR “Enteric virus” OR “Enteric viruses” OR Enterovirus OR Enteroviruses OR “E. coli” OR “Escherichia coli” OR Gastrointestinal OR “Gastro intestinal” OR Gastro-enteric OR <i>Giardia</i> OR Helicobacter OR Helminth OR Hepatitis OR Intestinal OR Norovirus OR “Norwold-like virus” OR Rotavirus OR <i>Salmonella</i> OR Shigella OR “Vibrio cholera” OR “Vibrio cholerae” OR Waterborne OR Water-borne OR “Waterborne pathogen” OR “Waterborne pathogens”) AND (Afghanistan OR Algeria OR Angola OR Anguilla OR Antigua OR Barbuda OR Argentina OR Armenia OR Armenian OR Aruba OR Azerbaijan OR Bahamas OR Bahrain OR Bangladesh OR Barbados OR Benin OR Byelarus OR Byelorussian OR Belarus OR Belorussian OR Belorussia OR Belize OR Bhutan OR Bolivia OR Botswana OR Brazil OR Brunei OR Burkina Faso OR “Burkina Fasso” OR “Upper Volta” OR Burundi OR Urundi OR Cambodia OR “Khmer Republic” OR Kampuchea OR Cameroon OR Camerons OR Cameron OR Camerons OR “Cape Verde” OR “Cayman Islands” OR “Central African Republic” OR Chad OR Chile OR China OR Colombia OR Comoros OR “Comoro Islands” OR Comores OR Mayotte OR Congo OR Zaire OR “Cook Islands” OR “Costa Rica” OR “Cote dIvoire” OR “Ivory Coast” OR Croatia OR Cuba OR Cyprus OR Djibouti OR “French Somaliland” OR Dominica OR “Dominican Republic” OR “East Timor” OR “East Timur” OR “Timor Leste” OR Ecuador OR Egypt OR “United Arab Republic” OR “El Salvador” OR Eritrea OR Ethiopia OR “Falkland Islands” OR “Las Malvinas” OR Fiji OR Gabon OR “Gabonese Republic” OR Gambia OR Gaza OR “Georgia Republic” OR “Georgian Republic” OR Ghana OR “Gold Coast” OR Greece OR Grenada OR Guatemala OR Guinea OR Guam OR Guadeloupe OR Guiana OR Guyana OR Haiti OR Honduras OR “Hong Kong” OR India OR Maldives OR Indonesia OR Iran OR Iraq OR Jamaica OR Jordan OR Kazakhstan OR Kazakh OR Kenya OR Kiribati OR Korea OR Kosovo OR Kuwait OR Kyrgyzstan OR Kirghizia OR “Kyrgyz Republic” OR Kirghiz OR Kirgizstan OR “Lao PDR” OR Laos OR Lebanon OR Lesotho OR Basutoland OR Liberia OR Libya OR Macau OR Madagascar OR “Malagasy Republic” OR Maldives OR Malaysia OR Malaya OR Malay OR Sabah OR Sarawak OR Malawi OR Nyasaland OR Mali OR Malta OR “Marshall Islands” OR Martinique OR Mauritania OR Mauritius OR “Agalega Islands” OR Mexico OR Micronesia OR “Middle East” OR Mongolia OR Montserrat OR Morocco OR Ifni OR Mozambique OR Myanmar OR Myanma OR Burma OR Namibia OR Nauru OR Nepal OR Niui OR “Netherlands Antilles” OR “New Caledonia” OR Nicaragua OR Niger OR Nigeria OR “Northern Mariana Islands” OR Oman OR Mayotte OR Muscat OR Pakistan OR Palau OR Palestine OR Panama OR Paraguay OR Peru OR Philippines OR Philipines OR Phillipines OR Philippines OR Polynesia OR “Puerto Rico” OR Qatar OR Reunion OR Rwanda OR Ruanda OR “Saint Kitts” OR “St Kitts” OR Nevis OR “Saint Lucia” OR “St Lucia” OR “Saint Vincent” OR “St Vincent” OR Grenadines OR Samoa OR “Samoan Islands” OR “Navigator Island” OR “Navigator Islands” OR “Sao Tome” OR “Saudi Arabia” OR Senegal OR Serbia OR Montenegro OR Seychelles OR “Sierra Leone” OR Singapore OR “Sri Lanka” OR Ceylon OR “Solomon Islands” OR Somalia OR “South Africa” OR Sudan OR Suriname OR Surinam OR Swaziland OR Syria OR Tajikistan OR Tadjikistan OR Tadjik OR Tanzania OR Thailand OR Togo OR “Togolese Republic” OR Tokelau OR Tonga OR Trinidad OR Tobago OR Tunisia OR Turkey OR Turkmenistan OR Turkmen OR “Turks Caicos” OR “Tuvalu Uganda” OR “United Arab Emirates” OR Uruguay OR Uzbekistan OR Uzbek OR Vanuatu OR “New Hebrides” OR Venezuela OR Vietnam OR “Viet Nam” OR “Virgin Islands” OR “West Bank” OR Yemen OR Yugoslavia OR Zambia OR Zimbabwe)</p> |                                  |  |

SUPPLEMENTAL TABLE 6  
Criteria and associated scoring used to assess likely impact of bias and/or poor study quality

| Criteria                                                    | Score = 0 (bias or poor quality likely) | Score = 1 (uncertain about bias/quality)                   | Score = 2 (bias or poor quality less likely) |
|-------------------------------------------------------------|-----------------------------------------|------------------------------------------------------------|----------------------------------------------|
| 1. Country and region where study conducted                 | Neither specified                       | Country but not region specified                           | Both country and region specified            |
| 2. Study year and data collection period reported           | Neither year nor duration specified     | Year or duration specified                                 | Both year and duration specified             |
| 3. Random sampling/selection used                           | No or not specified                     | Possibly, but unclear                                      | Yes, clearly stated                          |
| 4. Sampling/selection method clearly described              | No                                      | Yes, but unclear                                           | Yes                                          |
| 5.1. Health outcome assessment protocol described           | No                                      | Yes                                                        |                                              |
| 5.2. Health outcome assessed directly or reported           | Reported (by or for participant)        | Direct measurement (blood, stool, other samples, or tests) |                                              |
| 6.1. 2 × 2 table (or data needed to construct one) provided | No                                      | Yes                                                        |                                              |
| 6.2. Adjusted effect estimates provided                     | No                                      | Yes                                                        |                                              |

SUPPLEMENTAL TABLE 7  
Completed PRISMA 2009 checklist

| Section/topic             | # | Checklist item                                                                                                                                                                                                                                                                                              | Reported on page #      |
|---------------------------|---|-------------------------------------------------------------------------------------------------------------------------------------------------------------------------------------------------------------------------------------------------------------------------------------------------------------|-------------------------|
| <b>TITLE</b>              |   |                                                                                                                                                                                                                                                                                                             |                         |
| Title                     | 1 | Identify the report as a systematic review, meta-analysis, or both.                                                                                                                                                                                                                                         | Title page              |
| <b>ABSTRACT</b>           |   |                                                                                                                                                                                                                                                                                                             |                         |
| Structured summary        | 2 | Provide a structured summary including, as applicable: background; objectives; data sources; study eligibility criteria, participants, and interventions; study appraisal and synthesis methods; results; limitations; conclusions and implications of key findings; systematic review registration number. | 1                       |
| <b>INTRODUCTION</b>       |   |                                                                                                                                                                                                                                                                                                             |                         |
| Rationale                 | 3 | Describe the rationale for the review in the context of what is already known.                                                                                                                                                                                                                              | 2–3                     |
| Objectives                | 4 | Provide an explicit statement of questions being addressed with reference to participants, interventions, comparisons, outcomes, and study design (PICOS).                                                                                                                                                  | 4                       |
| <b>METHODS</b>            |   |                                                                                                                                                                                                                                                                                                             |                         |
| Protocol and registration | 5 | Indicate if a review protocol exists, if and where it can be accessed (e.g., Web address), and, if available, provide registration information including registration number.                                                                                                                               | –                       |
| Eligibility criteria      | 6 | Specify study characteristics (e.g., PICOS, length of follow-up) and report characteristics (e.g., years considered, language, publication status) used as criteria for eligibility, giving rationale.                                                                                                      | 4                       |
| Information sources       | 7 | Describe all information sources (e.g., databases with dates of coverage, contact with study authors to identify additional studies) in the search and date last searched.                                                                                                                                  | 4                       |
| Search                    | 8 | Present full electronic search strategy for at least one database, including any limits used, such that it could be repeated.                                                                                                                                                                               | Supplemental Tables 2–5 |
| Study selection           | 9 | State the process for selecting studies (i.e., screening, eligibility, included in systematic review, and, if applicable, included in the meta-analysis).                                                                                                                                                   | 4–5                     |

(continued)

SUPPLEMENTAL TABLE 7

Continued

| Section/topic                      | #  | Checklist item                                                                                                                                                                                                         | Reported on page #              |
|------------------------------------|----|------------------------------------------------------------------------------------------------------------------------------------------------------------------------------------------------------------------------|---------------------------------|
| Data collection process            | 10 | Describe method of data extraction from reports (e.g., piloted forms, independently, in duplicate) and any processes for obtaining and confirming data from investigators.                                             | 5–6                             |
| Data items                         | 11 | List and define all variables for which data were sought (e.g., PICOS, funding sources) and any assumptions and simplifications made.                                                                                  | 4–5                             |
| Risk of bias in individual studies | 12 | Describe methods used for assessing risk of bias of individual studies (including specification of whether this was done at the study or outcome level), and how this information is to be used in any data synthesis. | 6–7                             |
| Summary measures                   | 13 | State the principal summary measures (e.g., risk ratio, difference in means).                                                                                                                                          | 5                               |
| Synthesis of results               | 14 | Describe the methods of handling data and combining results of studies, if done, including measures of consistency (e.g., $I^2$ ) for each meta-analysis.                                                              | 5–7                             |
| Risk of bias across studies        | 15 | Specify any assessment of risk of bias that may affect the cumulative evidence (e.g., publication bias, selective reporting within studies).                                                                           | 6–7                             |
| Additional analyses                | 16 | Describe methods of additional analyses (e.g., sensitivity or subgroup analyses, meta-regression), if done, indicating which were pre-specified.                                                                       | 6–7                             |
| <b>RESULTS</b>                     |    |                                                                                                                                                                                                                        |                                 |
| Study selection                    | 17 | Give numbers of studies screened, assessed for eligibility, and included in the review, with reasons for exclusions at each stage, ideally with a flow diagram.                                                        | 8–10                            |
| Study characteristics              | 18 | For each study, present characteristics for which data were extracted (e.g., study size, PICOS, follow-up period) and provide the citations.                                                                           | 8–13                            |
| Risk of bias within studies        | 19 | Present data on risk of bias of each study and, if available, any outcome level assessment (see item 12).                                                                                                              | 11–13                           |
| Results of individual studies      | 20 | For all outcomes considered (benefits or harms), present, for each study: (a) simple summary data for each intervention group (b) effect estimates and confidence intervals, ideally with a forest plot.               | 14–21                           |
| Synthesis of results               | 21 | Present results of each meta-analysis done, including confidence intervals and measures of consistency.                                                                                                                | 14–21                           |
| Risk of bias across studies        | 22 | Present results of any assessment of risk of bias across studies (see Item 15).                                                                                                                                        | 21 and Supplemental Tables 8–10 |
| Additional analysis                | 23 | Give results of additional analyses, if done (e.g., sensitivity or subgroup analyses, meta-regression [see Item 16]).                                                                                                  | Supplemental Tables 6–7         |
| <b>DISCUSSION</b>                  |    |                                                                                                                                                                                                                        |                                 |
| Summary of evidence                | 24 | Summarize the main findings including the strength of evidence for each main outcome; consider their relevance to key groups (e.g., healthcare providers, users, and policy makers).                                   | 22–28                           |
| Limitations                        | 25 | Discuss limitations at study and outcome level (e.g., risk of bias), and at review-level (e.g., incomplete retrieval of identified research, reporting bias).                                                          | 26–27                           |

(continued)

SUPPLEMENTAL TABLE 7

Continued

| Section/topic  | #  | Checklist item                                                                                                                             | Reported on page # |
|----------------|----|--------------------------------------------------------------------------------------------------------------------------------------------|--------------------|
| Conclusions    | 26 | Provide a general interpretation of the results in the context of other evidence, and implications for future research.                    | 27–28              |
| <b>FUNDING</b> |    |                                                                                                                                            |                    |
| Funding        | 27 | Describe sources of funding for the systematic review and other support (e.g., supply of data); role of funders for the systematic review. | 29                 |

Source: <http://www.prisma-statement.org/documents/PRISMA%202009%20checklist.doc>

From: Moher D, Liberati A, Tetzlaff J, Altman DG, The PRISMA Group (2009). Preferred Reporting Items for Systematic Reviews and Meta-Analyses: The PRISMA Statement. PLoS Med 6(7): e1000097. doi:10.1371/journal.pmed1000097

Page numbers reference the submitted manuscript and may not align with the published version.

SUPPLEMENTAL TABLE 8

Meta-regression results for studies reporting protozoal and diarrheal outcomes

| Variables                          | Protozoal outcome studies (N = 11) |            |         |                     | Diarrheal outcome studies (N = 7) |              |         |                     |
|------------------------------------|------------------------------------|------------|---------|---------------------|-----------------------------------|--------------|---------|---------------------|
|                                    | OR                                 | 95% CI     | P value | Monte Carlo P value | OR                                | 95% CI       | P value | Monte Carlo P value |
| Total participants (or households) | 1.00                               | 0.99–1.01  | 0.054   | 0.02                | 1.00                              | 0.99 to 1.00 | 0.69    | 0.65                |
| Participant age < 15 (vs. adults)  | 1.16                               | 0.36–3.74  | 0.74    | 0.73                | 0.19                              | 0.00 to > 3k | 0.28    | 0.19                |
| U participants (vs. only R)        | 1.40                               | 0.22–9.02  | 0.65    | 0.60                | --                                | --           | --      | --                  |
| U and R participants (vs. only R)  | 1.46                               | 0.18–12.05 | 0.64    | 0.61                | --                                | --           | --      | --                  |
| Outbreak investigation (vs. other) | -                                  | -          | -       | -                   | --                                | --           | --      | --                  |
| Study duration (months)            | 0.98                               | 0.94–1.01  | 0.17    | 0.10                | 0.98                              | 0.44 to 2.20 | 0.79    | 0.44                |
| Random sampling (vs. no)           | 0.12                               | 0.01–2.49  | 0.12    | 0.08                | 1.47                              | 0.01 to 332  | 0.53    | 0.56                |
| Outcome measured (vs. reported)    | -                                  | -          | -       | -                   | 0.89                              | 0.00 to 713  | 0.86    | 0.89                |

CI = confidence interval; OR = odds ratio; R = rural; U = urban; k = 1,000. Cells with "--" indicate instances where there was too much collinearity with the associated covariate. Cells with "-"- indicate instances where there were an insufficient number of observations available.

SUPPLEMENTAL TABLE 9

Meta-regression results for studies reporting protozoal and diarrheal outcomes: controlling for study quality

| Variables                                 | Protozoal outcome studies (N = 11) |            |         |                     | Diarrheal outcome studies (N = 7) |                |         |                     |
|-------------------------------------------|------------------------------------|------------|---------|---------------------|-----------------------------------|----------------|---------|---------------------|
|                                           | OR                                 | 95% CI     | P value | Monte Carlo P value | OR                                | 95% CI         | P value | Monte Carlo P value |
| Total participants (or households)        | 1.00                               | 0.99–1.00  | 0.42    | 0.43                | 1.00                              | 0.99 to 1.00   | 0.53    | 0.48                |
| Participant age < 15 (vs. adults)         | 1.24                               | 0.16–9.68  | 0.79    | 0.72                | 0.21                              | 0.00 to 665.7  | 0.25    | 0.09                |
| U participants (vs. only R)               | 4.56                               | 0.35–59.5  | 0.18    | 0.14                | --                                | --             | --      | --                  |
| U and R participants (vs. only R)         | 1.33                               | 0.01–127.7 | 0.87    | 0.93                | --                                | --             | --      | --                  |
| Outbreak investigation (vs. other)        | -                                  | -          | -       | -                   | 6.82                              | 0.00 to > 999k | 0.59    | 0.67                |
| Study duration (months)                   | 0.97                               | 0.86–1.08  | 0.47    | 0.42                | 0.76                              | 0.00 to 88.9   | 0.60    | 0.59                |
| Quality index grade high (vs. medium/low) | 3.53                               | 0.03–480.3 | 0.52    | 0.47                | 0.72                              | 0.00 to > 200k | 0.79    | 0.72                |

CI = confidence interval; OR = odds ratio; R = rural; U = urban; k = 1,000. Cells with "--" indicate instances where there was too much collinearity with the associated covariate. Cells with "-"- indicate instances where there were an insufficient number of observations available.

SUPPLEMENTAL TABLE 10  
Assessment of likely impact of bias and/or poor study quality: Results for each study

| Author      | Year  | Bias/quality criteria |   |   |   |     |     |     |     | Quality index* | Grade† |
|-------------|-------|-----------------------|---|---|---|-----|-----|-----|-----|----------------|--------|
|             |       | 1                     | 2 | 3 | 4 | 5   |     | 6   |     |                |        |
|             |       |                       |   |   |   | 5.1 | 5.2 | 6.1 | 6.2 |                |        |
| Aggarwal    | 2002  | 2                     | 2 | 2 | 2 | 1   | 1   | 0   | 0   | 8.3            | High   |
| Al-Delaimy  | 2014  | 2                     | 2 | 0 | 2 | 1   | 1   | 1   | 0   | 7.5            | High   |
| Bello       | 2011  | 2                     | 2 | 0 | 2 | 1   | 1   | 0   | 1   | 7.5            | High   |
| Cardenas    | 1993  | 2                     | 2 | 2 | 0 | 1   | 0   | 1   | 0   | 6.7            | Medium |
| Carrero     | 2013  | 2                     | 1 | 0 | 2 | 1   | 1   | 1   | 0   | 6.7            | Medium |
| Choy        | 2014  | 2                     | 2 | 2 | 2 | 1   | 1   | 0   | 1   | 9.2            | High   |
| Cifuentes   | 1998  | 2                     | 2 | 1 | 0 | 1   | 1   | 1   | 0   | 6.7            | Medium |
| Cohen       | 2015  | 2                     | 2 | 2 | 2 | 1   | 0   | 0   | 0   | 7.5            | High   |
| Corwin      | 1995  | 2                     | 2 | 1 | 0 | 1   | 1   | 1   | 0   | 6.7            | Medium |
| Fredrick    | 2015  | 2                     | 2 | 1 | 2 | 1   | 1   | 1   | 1   | 9.2            | High   |
| Gunawardena | 2004  | 2                     | 2 | 2 | 0 | 1   | 1   | 0   | 1   | 7.5            | High   |
| Herrera     | 2006  | 2                     | 2 | 1 | 1 | 1   | 1   | 1   | 0   | 7.5            | High   |
| Iijima      | 2001  | 2                     | 2 | 1 | 1 | 1   | 0   | 1   | 0   | 6.7            | Medium |
| Kelly       | 1997  | 2                     | 2 | 1 | 0 | 1   | 1   | 0   | 0   | 5.8            | Low    |
| Knight      | 1992  | 2                     | 2 | 2 | 2 | 1   | 1   | 0   | 1   | 9.2            | High   |
| Lee         | 2012  | 2                     | 2 | 1 | 1 | 1   | 1   | 1   | 0   | 7.5            | High   |
| Li          | 2007  | 2                     | 1 | 2 | 0 | 1   | 1   | 0   | 1   | 6.7            | Medium |
| Marcano     | 2013  | 2                     | 1 | 1 | 0 | 1   | 1   | 1   | 0   | 5.8            | Low    |
| Nunez       | 2003  | 2                     | 1 | 1 | 0 | 1   | 1   | 1   | 0   | 5.8            | Low    |
| Psutka      | 2013  | 2                     | 1 | 2 | 2 | 0   | 0   | 0   | 0   | 5.8            | Low    |
| Ries        | 1992  | 2                     | 2 | 1 | 2 | 1   | 1   | 1   | 1   | 9.2            | High   |
| Rondon      | 2003  | 2                     | 2 | 1 | 1 | 1   | 1   | 1   | 0   | 7.5            | High   |
| Sarkar      | 2014a | 2                     | 2 | 1 | 1 | 1   | 1   | 0   | 1   | 7.5            | High   |
| Sarkar      | 2014b | 2                     | 2 | 1 | 0 | 1   | 1   | 0   | 1   | 6.7            | Medium |
| Sharma      | 2009  | 2                     | 2 | 2 | 1 | 1   | 1   | 1   | 1   | 9.2            | High   |
| Weber       | 1994  | 2                     | 2 | 1 | 0 | 1   | 1   | 1   | 0   | 6.7            | Medium |
| Wordemann   | 2006  | 2                     | 2 | 2 | 1 | 1   | 1   | 0   | 0   | 7.5            | High   |

\* Quality index calculating as a composite index of criteria 1–6, using equal weights and then converted to a 0–10 scale.

† Low score: < 6; medium score: 6–7; high score: ≥ 7.

SUPPLEMENTAL TABLE 11  
Pooled OR by outcome and stratified by estimated study quality grade

| Study quality grade                 | Low           |           | Medium        |           | High          |           |
|-------------------------------------|---------------|-----------|---------------|-----------|---------------|-----------|
|                                     | Pooled OR (n) | 95% CI    | Pooled OR (n) | 95% CI    | Pooled OR (n) | 95% CI    |
| <b>Bacterial</b>                    |               |           |               |           |               |           |
| <i>Vibrio cholerae</i>              |               |           | 0.53 (2)      | 0.29–0.96 | 0.11 (2)      | 0.01–1.12 |
| <i>Helicobacter pylori</i>          |               |           |               |           | 1.12 (1)      | 0.58–2.16 |
| <i>Salmonella typhi</i>             |               |           |               |           | 1.30 (1)      | 0.62–2.71 |
| <b>Helminthic</b>                   |               |           |               |           |               |           |
| Multiple helminthic infections      |               |           |               |           | 1.21 (2)      | 0.80–1.81 |
| <i>Ascaris</i>                      |               |           |               |           | 1.18 (2)      | 0.09–14.9 |
| <i>Strongyloides stercoralis</i>    |               |           |               |           | 0.30 (1)      | 0.12–0.76 |
| <i>Trichuris</i>                    |               |           |               |           | 1.62 (1)      | 0.46–5.70 |
| Hookworm                            |               |           |               |           | 1.16 (1)      | 0.26–5.10 |
| <b>Protozoal</b>                    |               |           |               |           |               |           |
| <i>Giardia</i>                      | 0.27 (1)      | 0.12–0.59 |               |           | 0.84 (3)      | 0.43–1.62 |
| <i>Blastocystis</i>                 |               |           | 0.17 (2)      | 0.03–0.94 | 0.40 (1)      | 0.19–0.86 |
| Multiple protozoan parasites        | 0.80 (1)      | 0.45–1.43 |               |           | 0.83 (1)      | 0.32–2.16 |
| <i>Cryptosporidium parvum</i>       |               |           |               |           | 0.49 (1)      | 0.25–0.97 |
| <i>Entamoeba histolytica/dispar</i> |               |           |               |           | 1.49 (1)      | 0.19–11.6 |
| <b>Viral</b>                        |               |           |               |           |               |           |
| Hepatitis E                         |               |           | 0.77 (1)      | 0.51–1.17 | 1.11 (1)      | 0.61–1.97 |
| Rotavirus                           |               |           | 0.83 (2)      | 0.65–1.05 |               |           |
| <b>Diarrheal</b>                    |               |           |               |           |               |           |
| Diarrheal disease outcomes          | 0.60 (2)      | 0.40–0.89 | 0.60 (3)      | 0.50–0.78 | 0.31 (2)      | 0.05–2.03 |

CI = confidence interval; OR = odds ratio.
